# Supplementary material for: Capturing variation in floral shape: a virtual3D based morphospace for Pelargonium
Source: PeerJ journal article supplement (doi:10.7717/peerj.8823), 2020-04-02

A

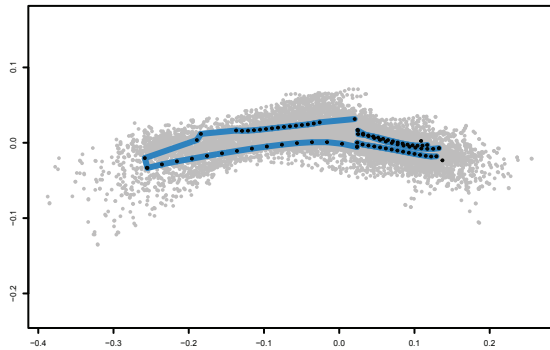

B

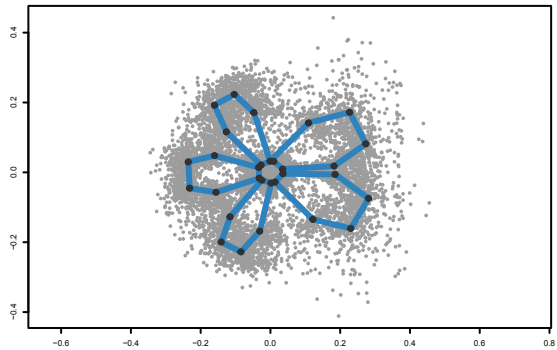

Supplement: Supplementary_Figure_1_mean_consensus_configuration_and_Procrustes_residuals_.pdf [file Supplementary_Figure_1_mean_consensus_configuration_and_Procrustes_residuals_.pdf]
