# Supplementary material for: Capturing variation in floral shape: a virtual3D based morphospace for Pelargonium
Source: PeerJ journal article supplement (doi:10.7717/peerj.8823), 2020-04-02

PC scores TUBE dataset

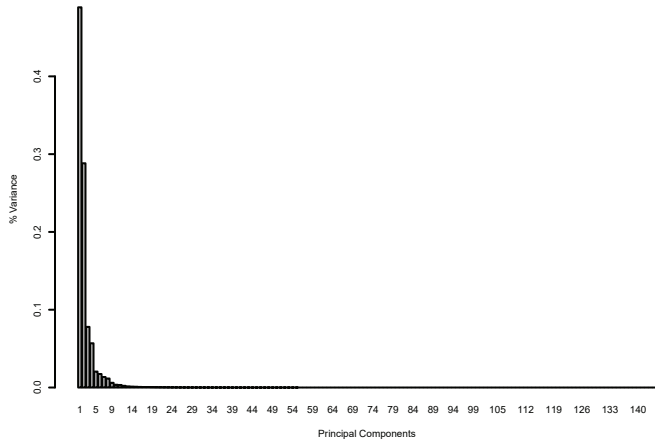

PC scores PETAL dataset

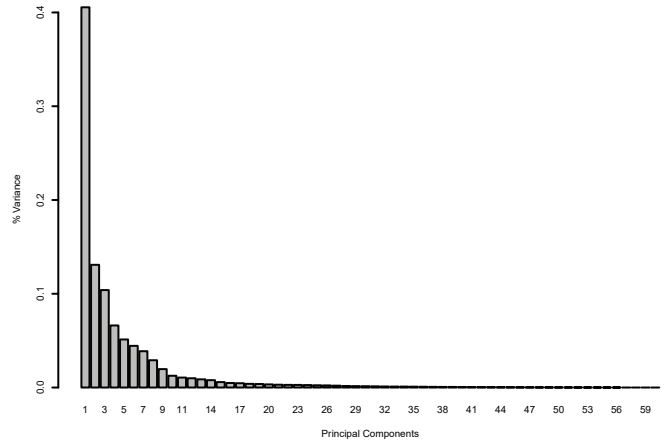

PC scores VIRTUAL3D dataset

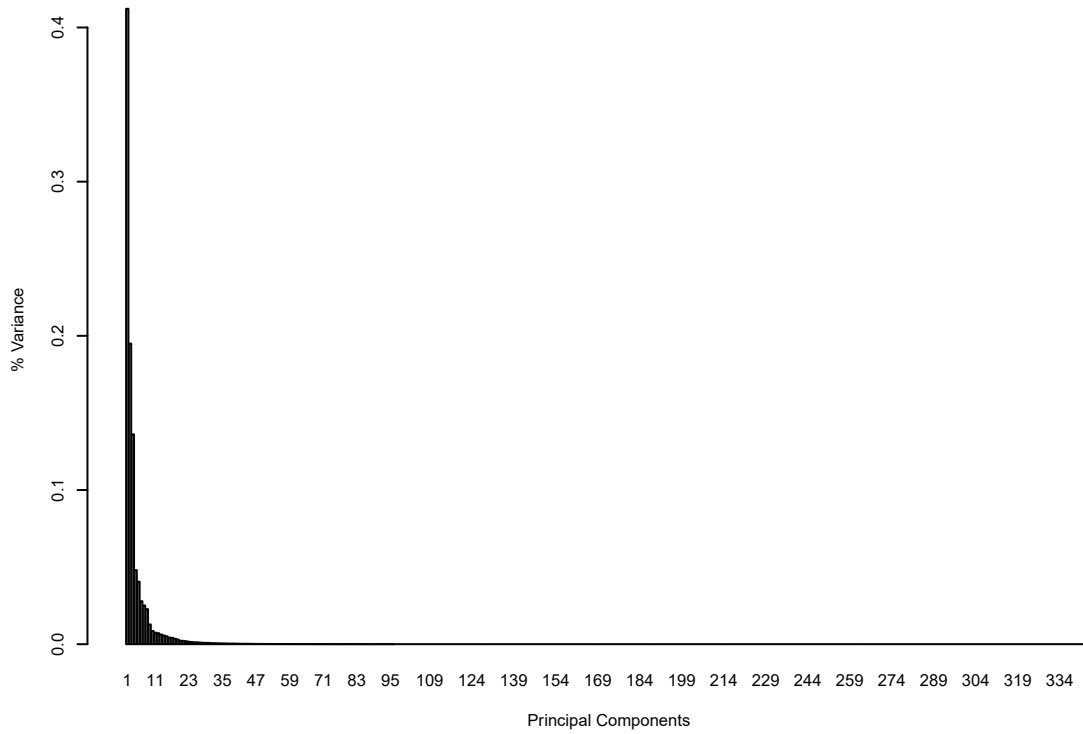

Supplement: Supplementary_Figure_2_PC_scores.pdf [file Supplementary_Figure_2_PC_scores.pdf]
